# Supplementary material for: Multiscale structural engineering endows tetragonal tungsten bronze relaxor ferroelectrics with excellent energy storage capabilities
Source: Research Square preprint supplement (doi:10.21203/rs.3.rs-8527989/v1), 2026-01-13
Supplement: Supplementary file 1 [file 11997bd0426c6567e3ff04d1.docx]

**Multiscale Structural Engineering Enables Superior Energy Storage in Tetragonal Tungsten Bronze Relaxor Ferroelectrics**

Saifei Wang1, Juntao Huang1, Guangyao Li1, Tao Yang1, Haihua Huang1*, Yajie Han1 Wei Li1*, Zhenxiang Cheng2*, He Qi3, Mahesh Kumar Joshi4, Peng Fu1*

1-School of Materials Science and Engineering, Liaocheng University, Liaocheng 252059, PR

2-Institute for Superconducting and Electronic Materials, University of Wollongong, Innovation Campus, North Wollongong, NSW 2500, Australia

3-School of Materials Science and Technology, Hainan University, Hainan 570228, China

4-Central Department of Chemistry, Tribhuvan University, Kathmandu 44613, Nepal


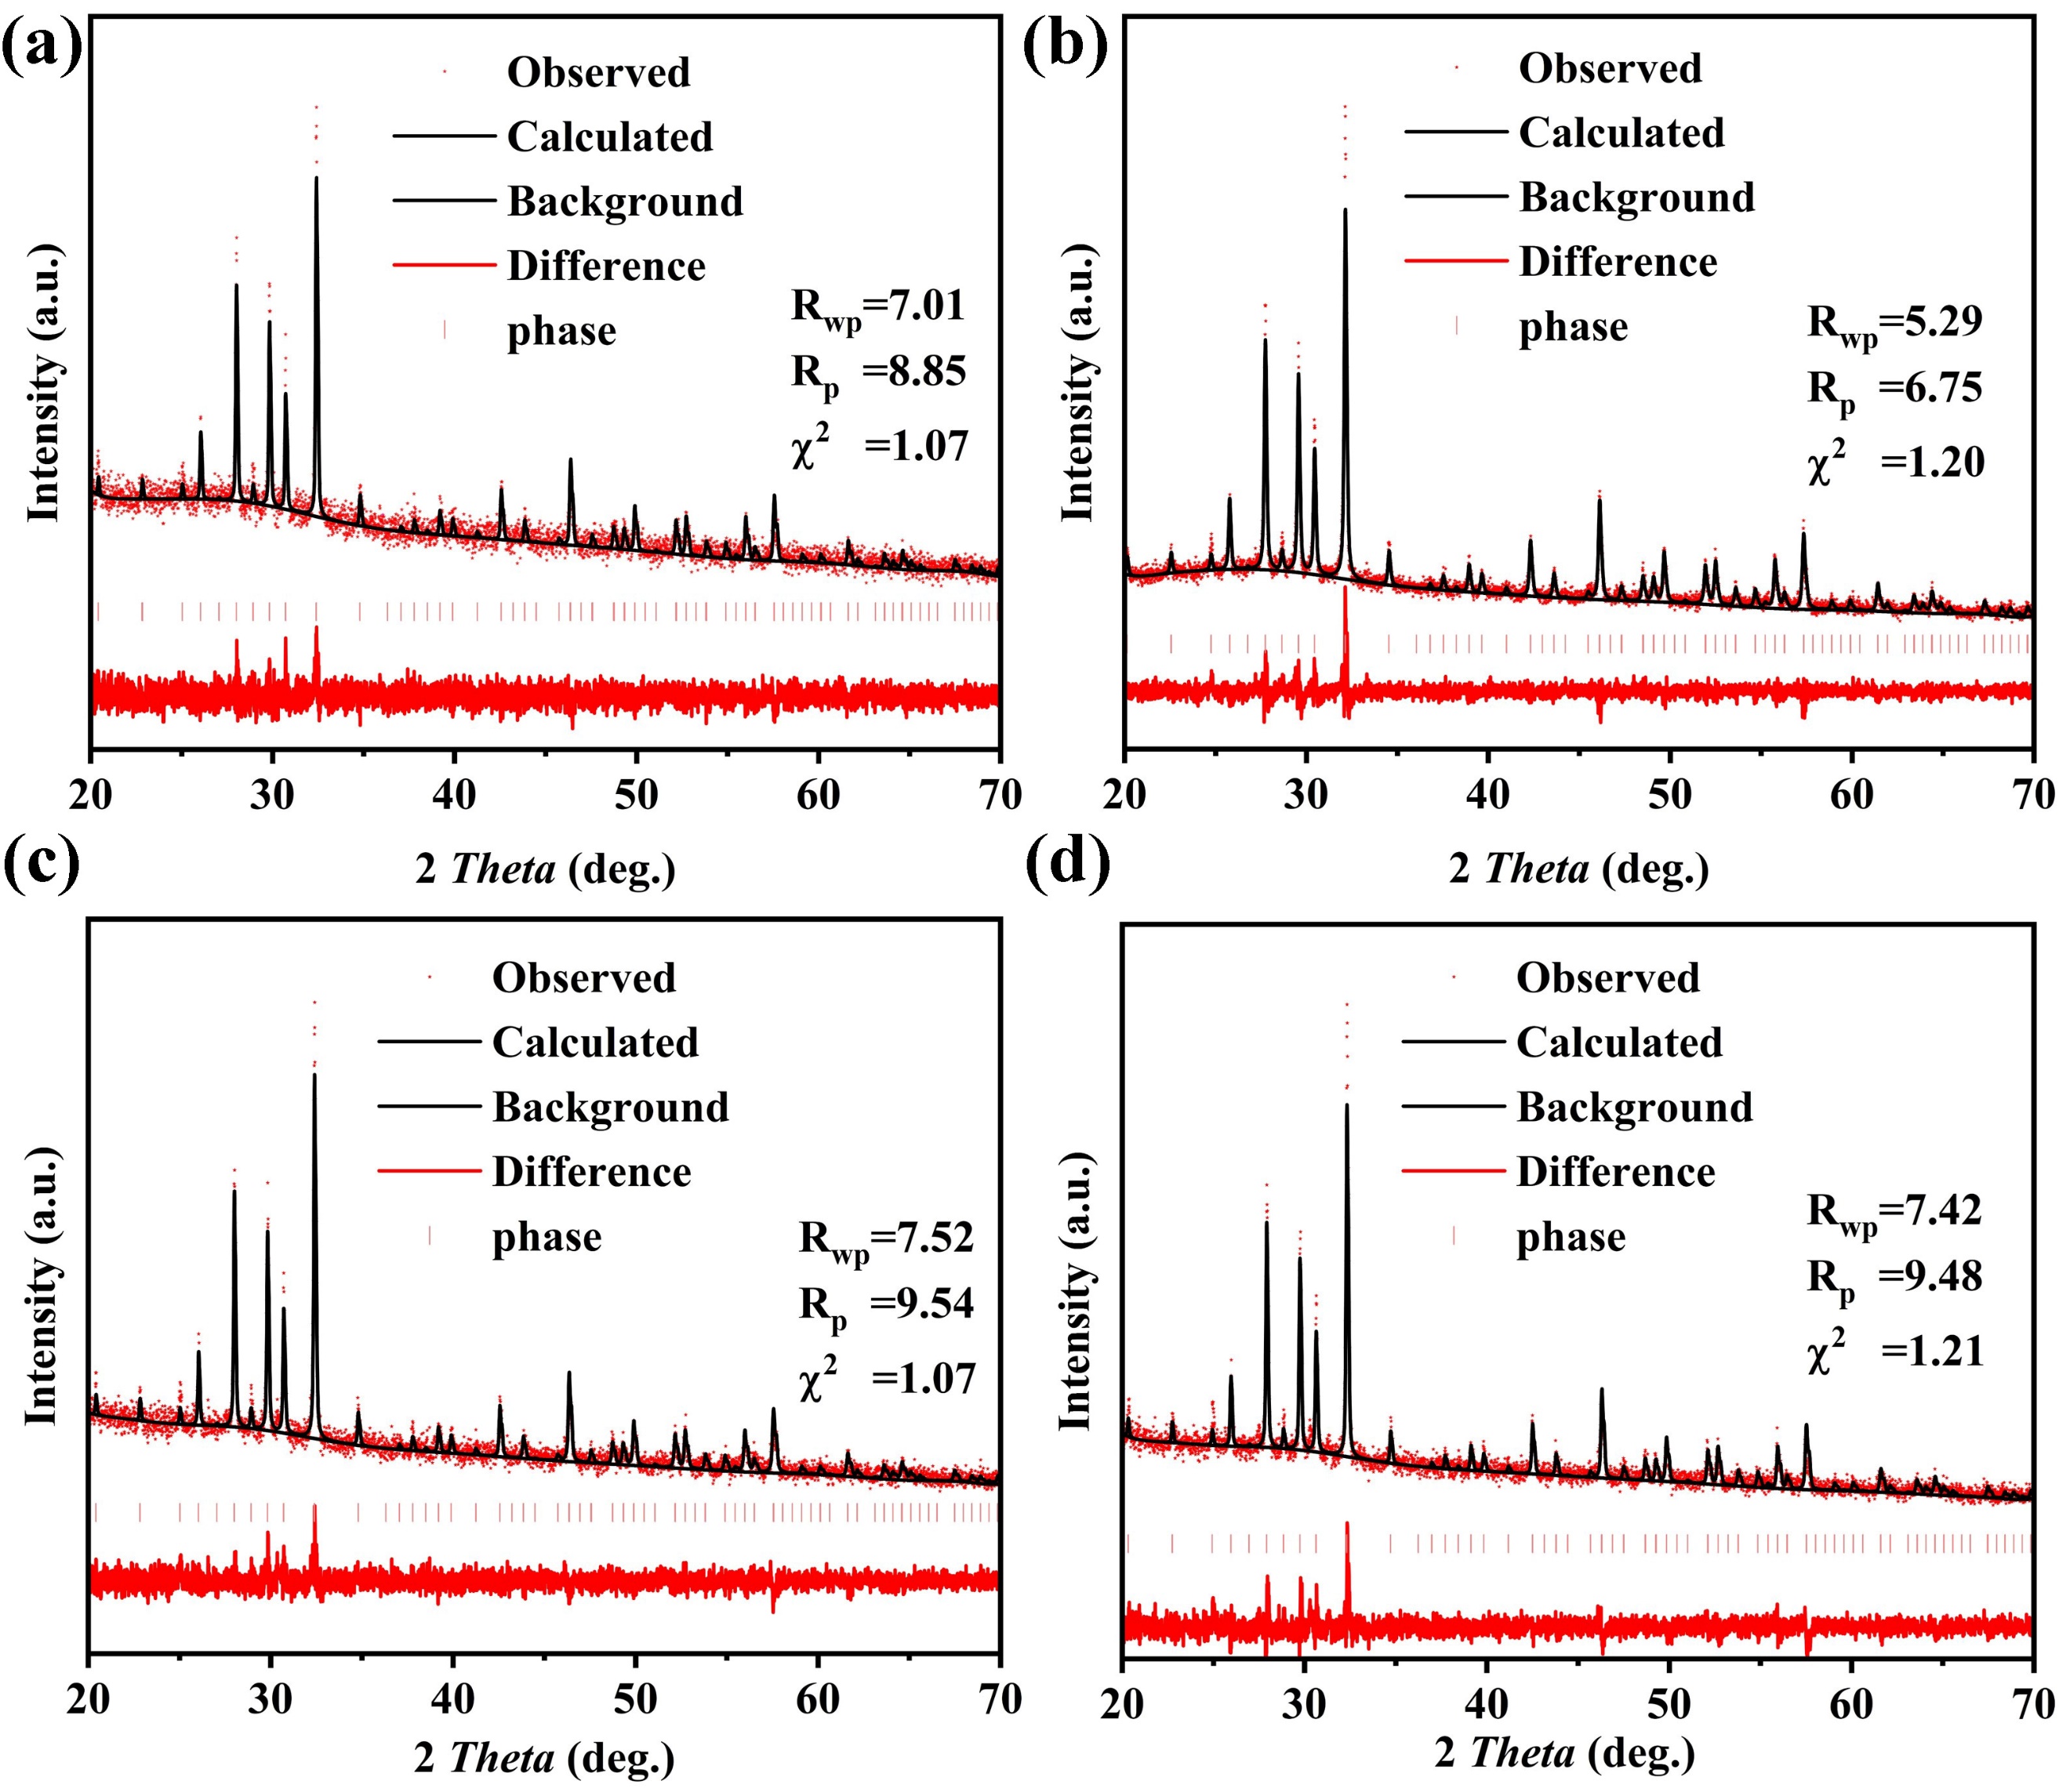


**Fig. S1|** Rietveld correction of X–ray diffraction data for BLBTN–*x* ceramics (a) *x*=0.35, (b) *x*=0.40, (c) *x*=0.45, (d) *x*=0.55.

| Samples | 0.35 | 0.4 | 0.45 | 0.5 | 0.55 |
| --- | --- | --- | --- | --- | --- |
| Space group | P4bm | P4bm | P4bm | P4bm | P4bm |
| a | 12.447250 | 12.430459 | 12.446912 | 12.443444 | 12.428993 |
| b | 12.447250 | 12.430459 | 12.446912 | 12.443444 | 12.428993 |
| c | 3.933159 | 3.928861 | 3.934113 | 3.932960 | 3.928716 |
| alpha | 90 | 90 | 90 | 90 | 90 |
| beta | 90 | 90 | 90 | 90 | 90 |
| gamma | 90 | 90 | 90 | 90 | 90 |
| c/a | 0.315986 | 0.316067 | 0.316071 | 0.316067 | 0.3160929 |
| volume | 609.380 | 607.073 | 609.495 | 608.977 | 606.905 |

**Table S1** Crystal Phase Data of BLBTN–*x* Ceramics Calculated by X–ray Rietveld Method


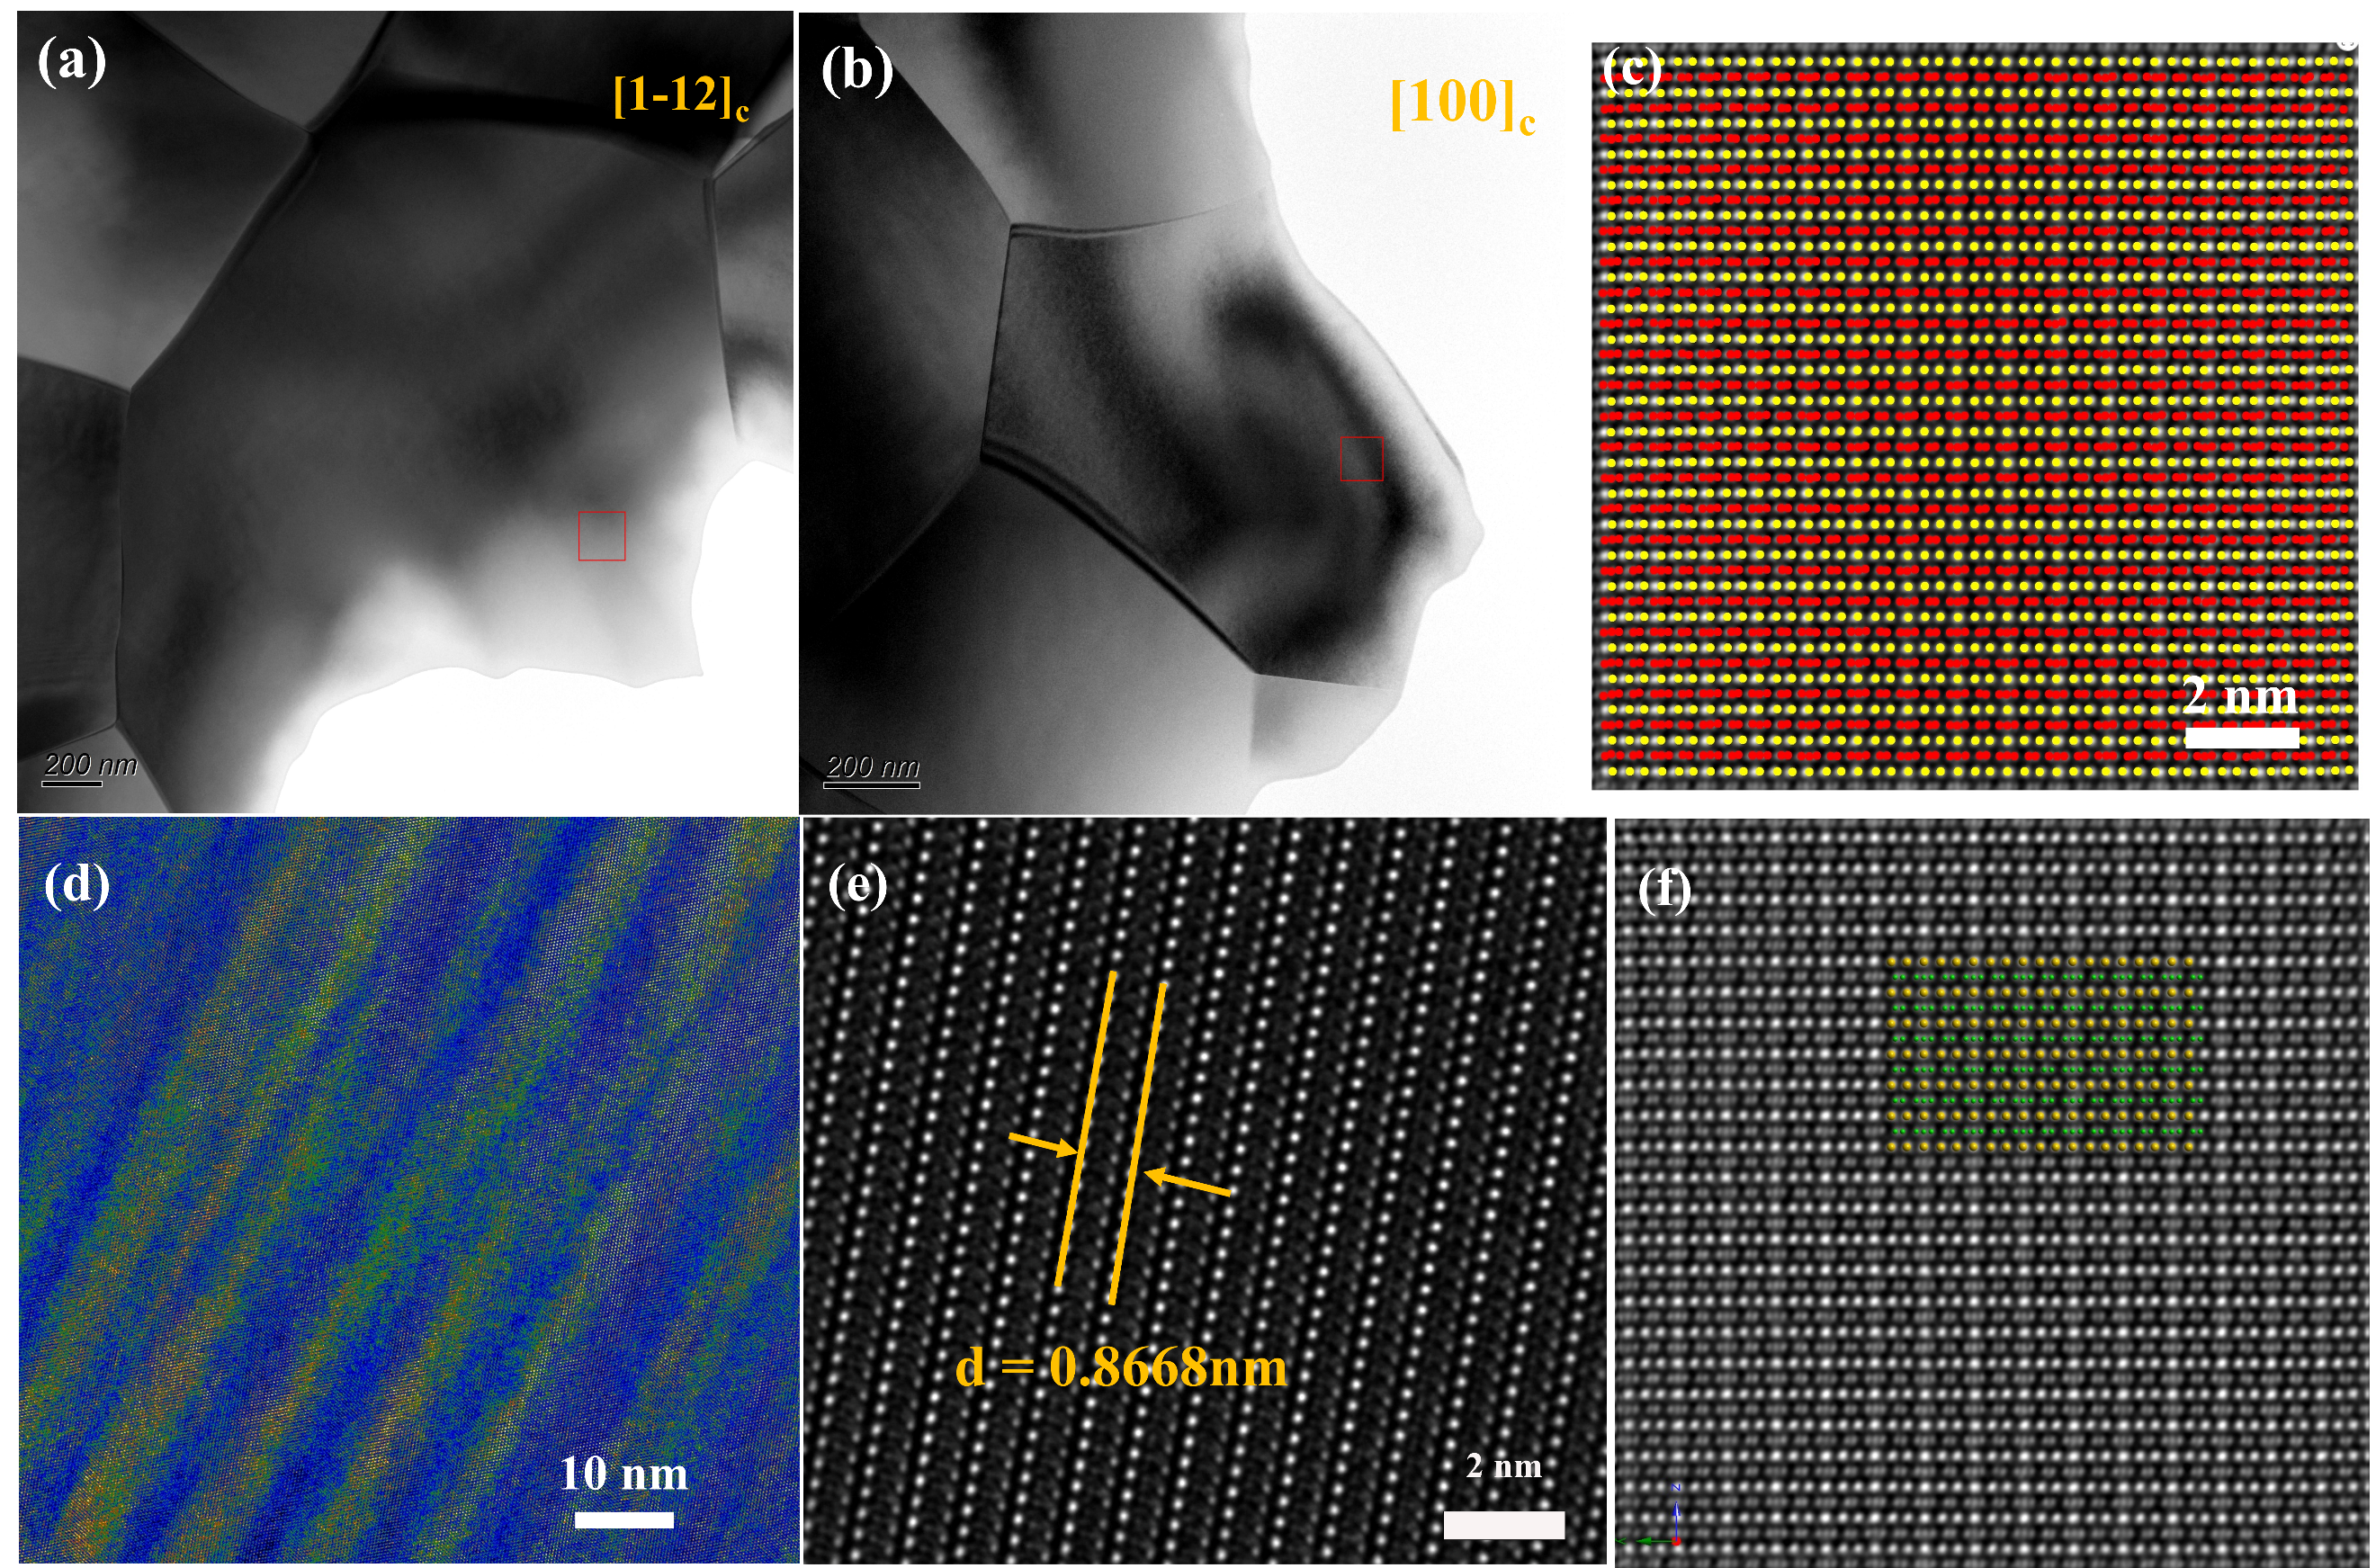


**Fig. S2|** Images of grains with different axes. (a) ; (b) [100]. **c [**100]c crystal plane atomic matching diagram. d High resolution TEM image. **e** High resolution image of crystal plane. **f** Lattice model along the [110] axis direction.


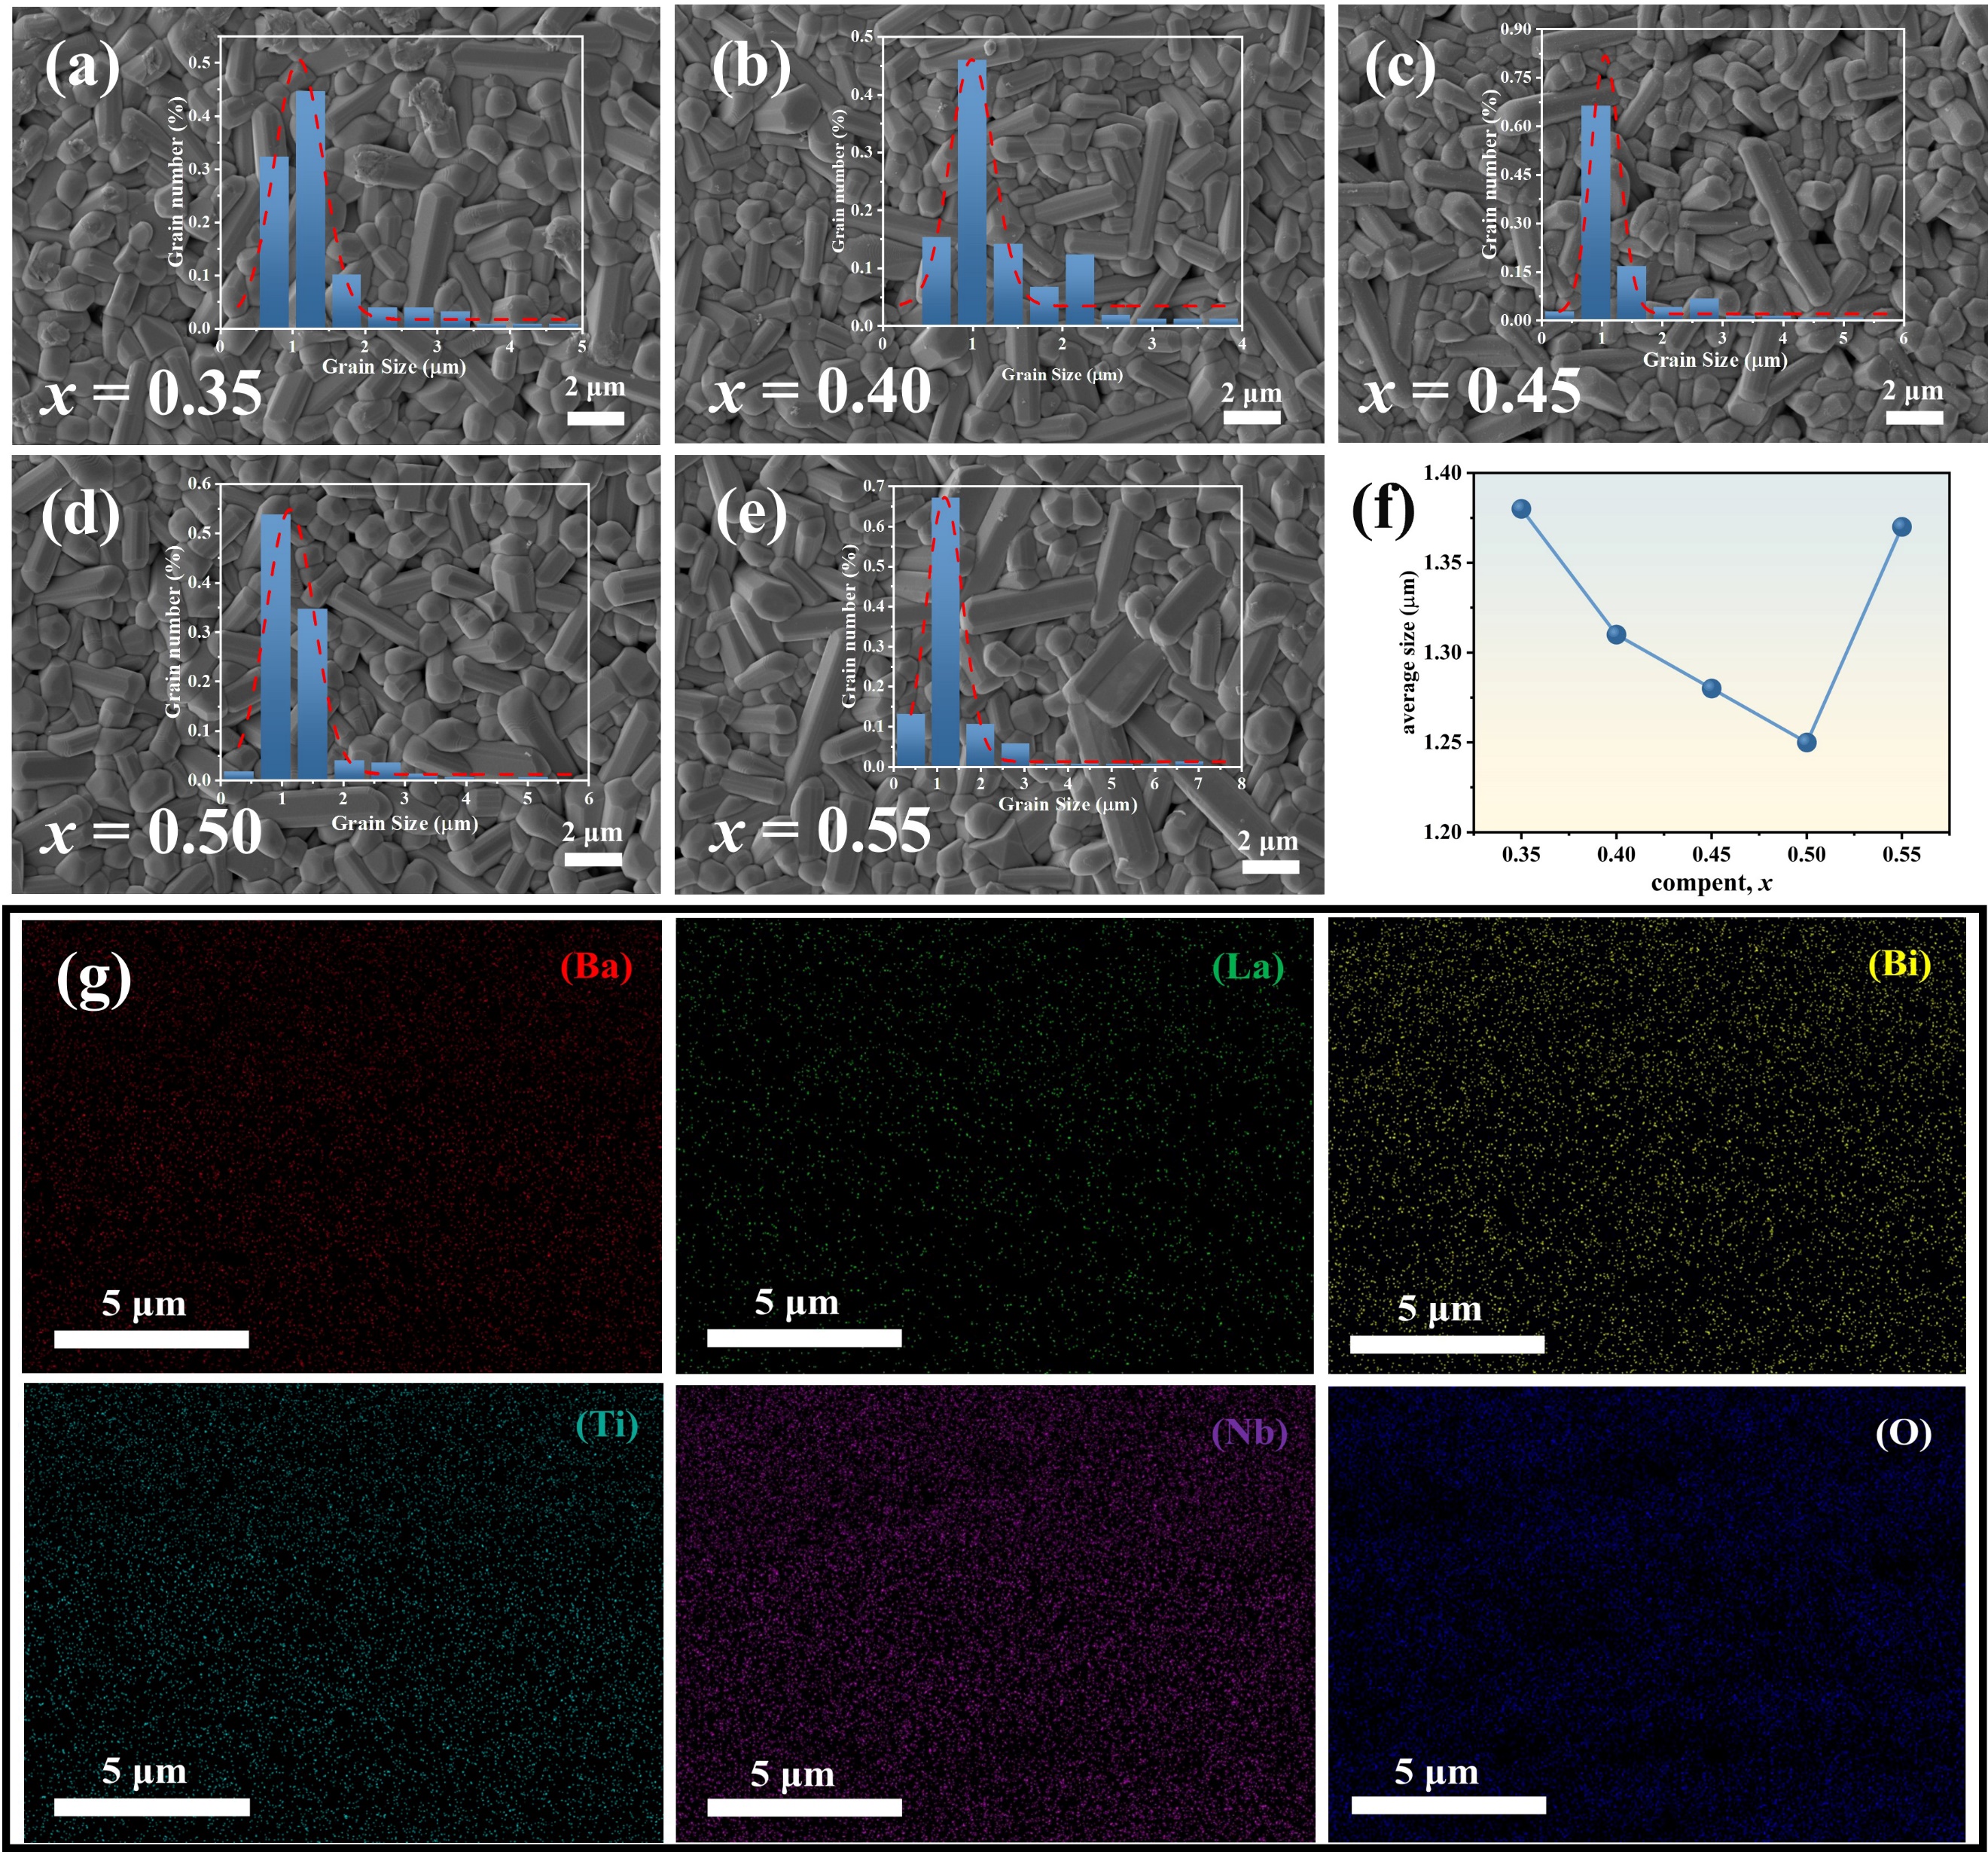


**Fig. S3| Local morphology of ceramics. a–e** Surface SEM images and particle size distribution of the BLBTN–*x* ceramics (*x* = 0.35, 0.40, 0.45, 0.50, 0.55); **f** surface element distribution of the BLBTN-0.5 ceramic.


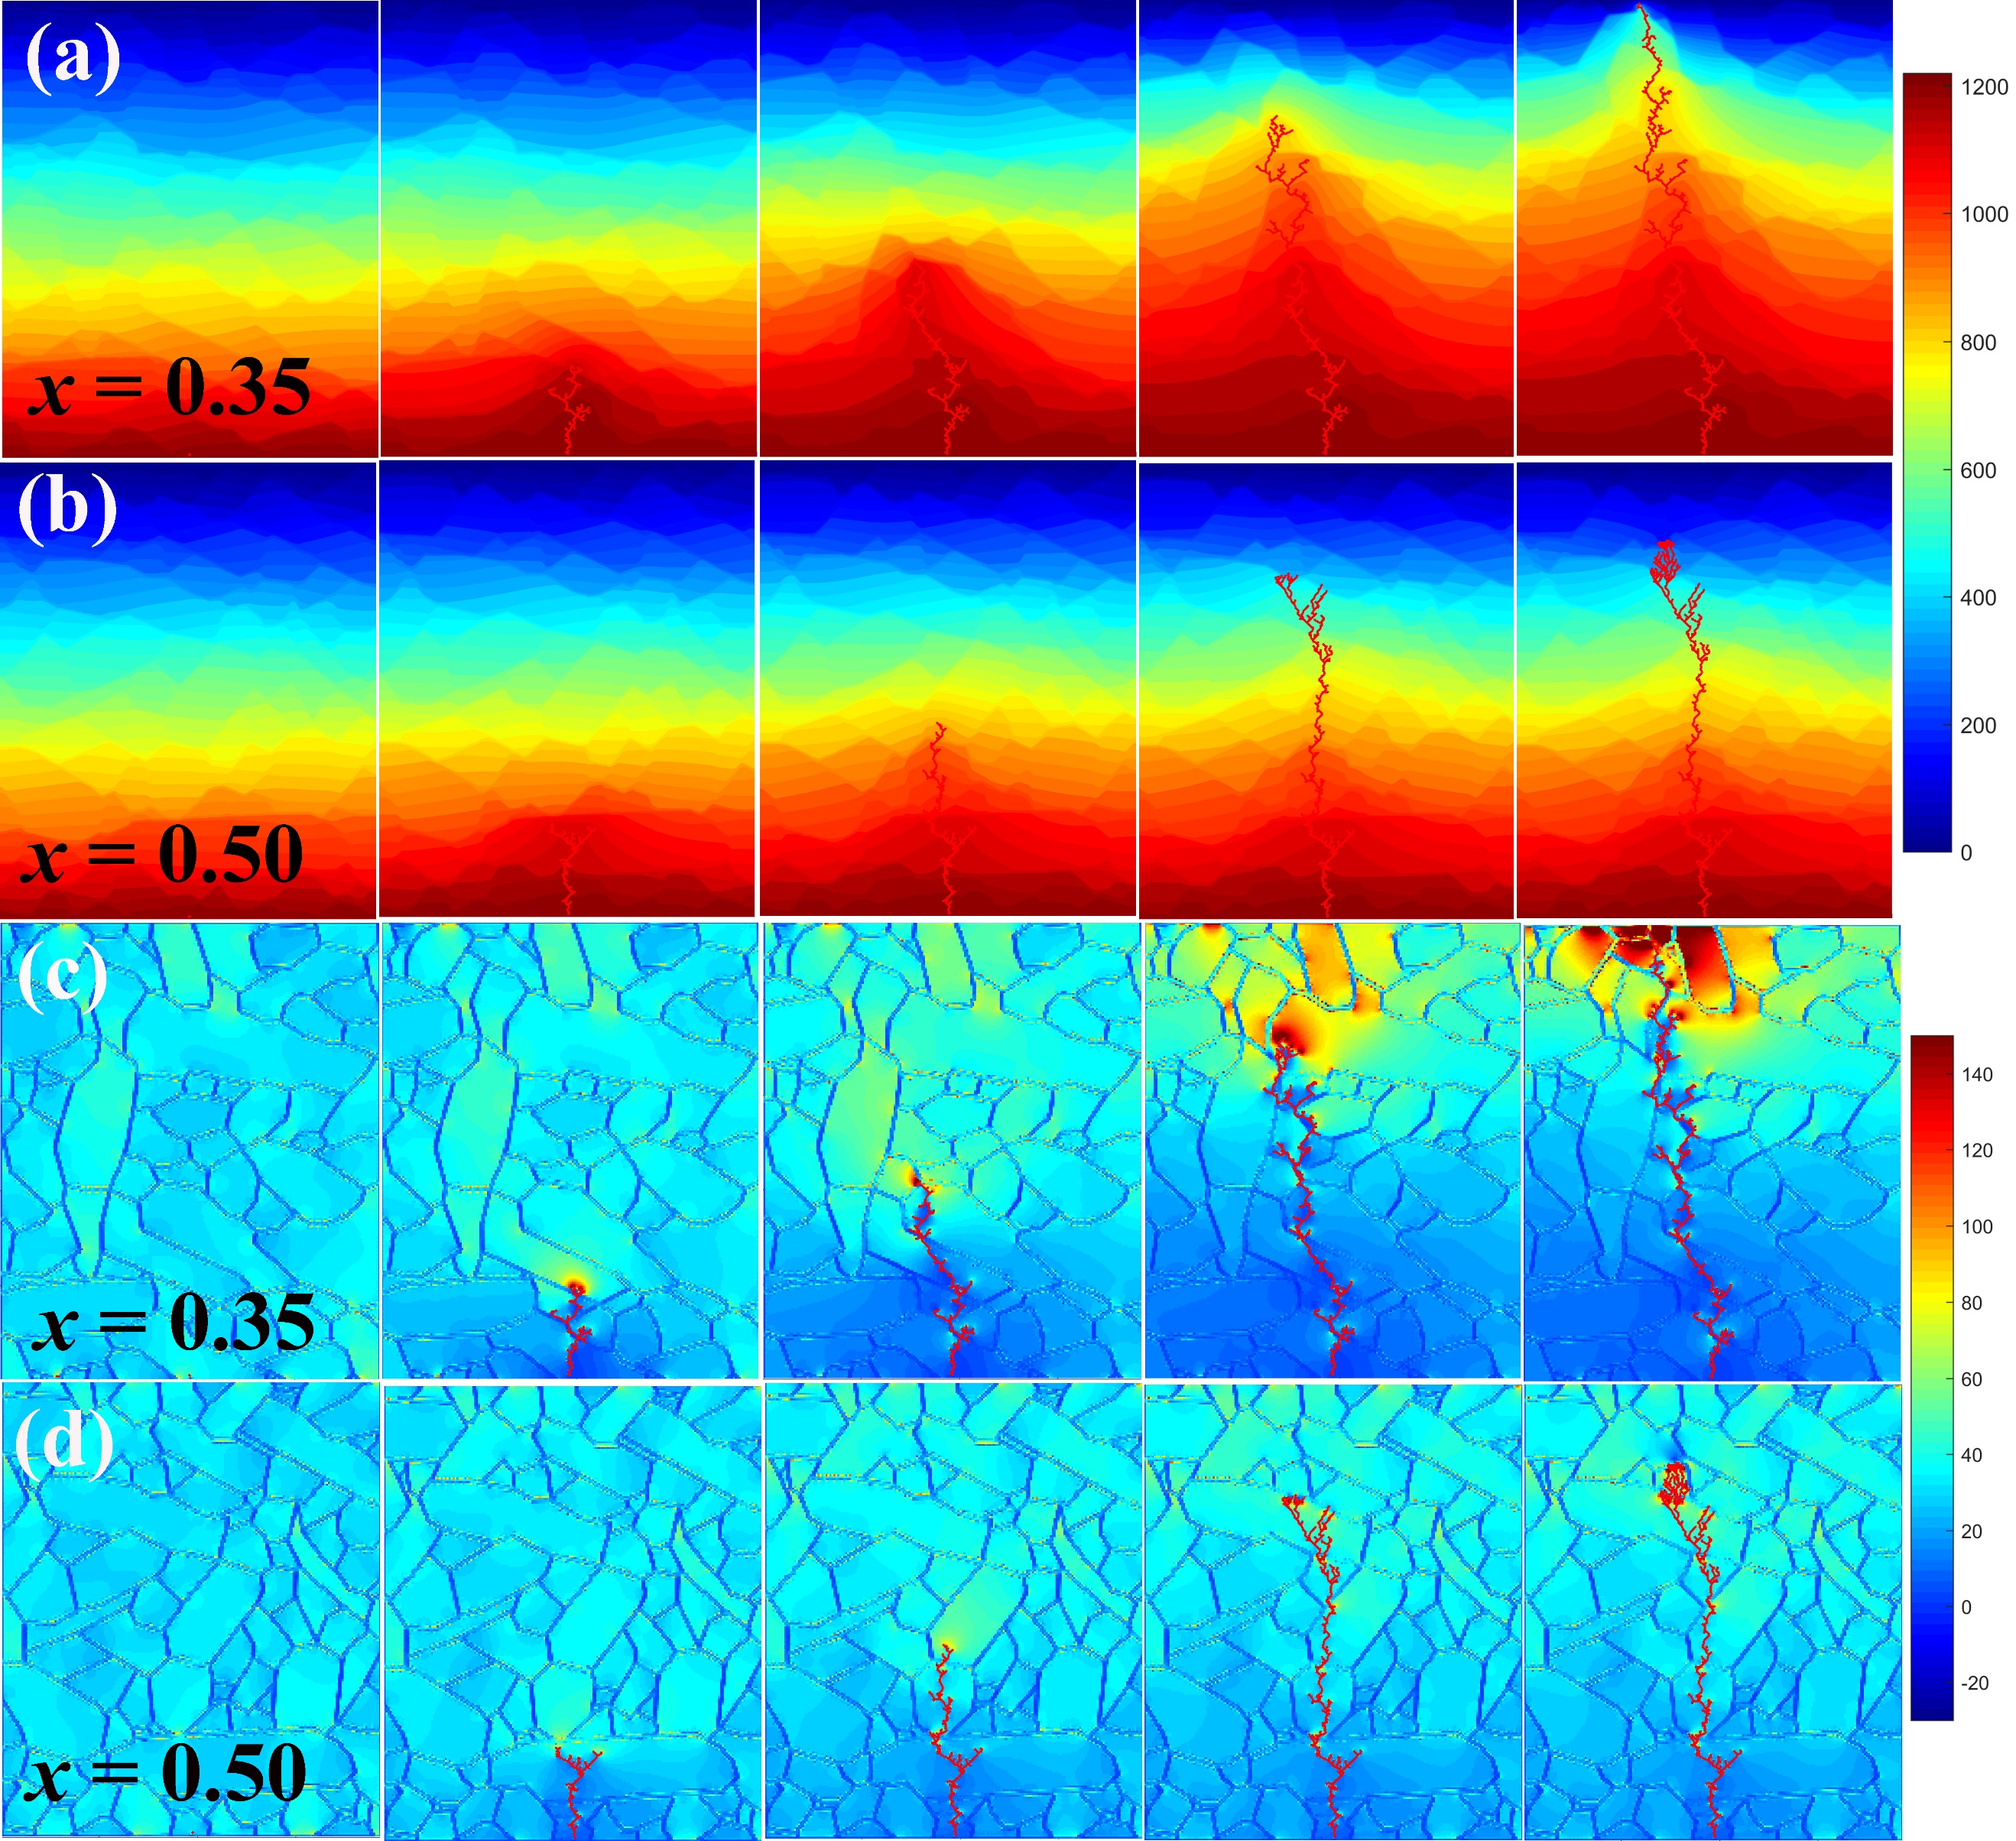


**Fig. S4|** Electric field distribution diagram: a *x*=0.35, **b** *x* = 0.50.Local electric field distribution: **c** *x*=0.35 **d** *x* = 0.50.
